# Supplementary material
Source: PubMed Central journal article supplement (PMC3139020)
Supplement: NIHMS296719-supplement-Supp_Fig_S1.pdf [file NIHMS296719-supplement-Supp_Fig_S1.pdf]

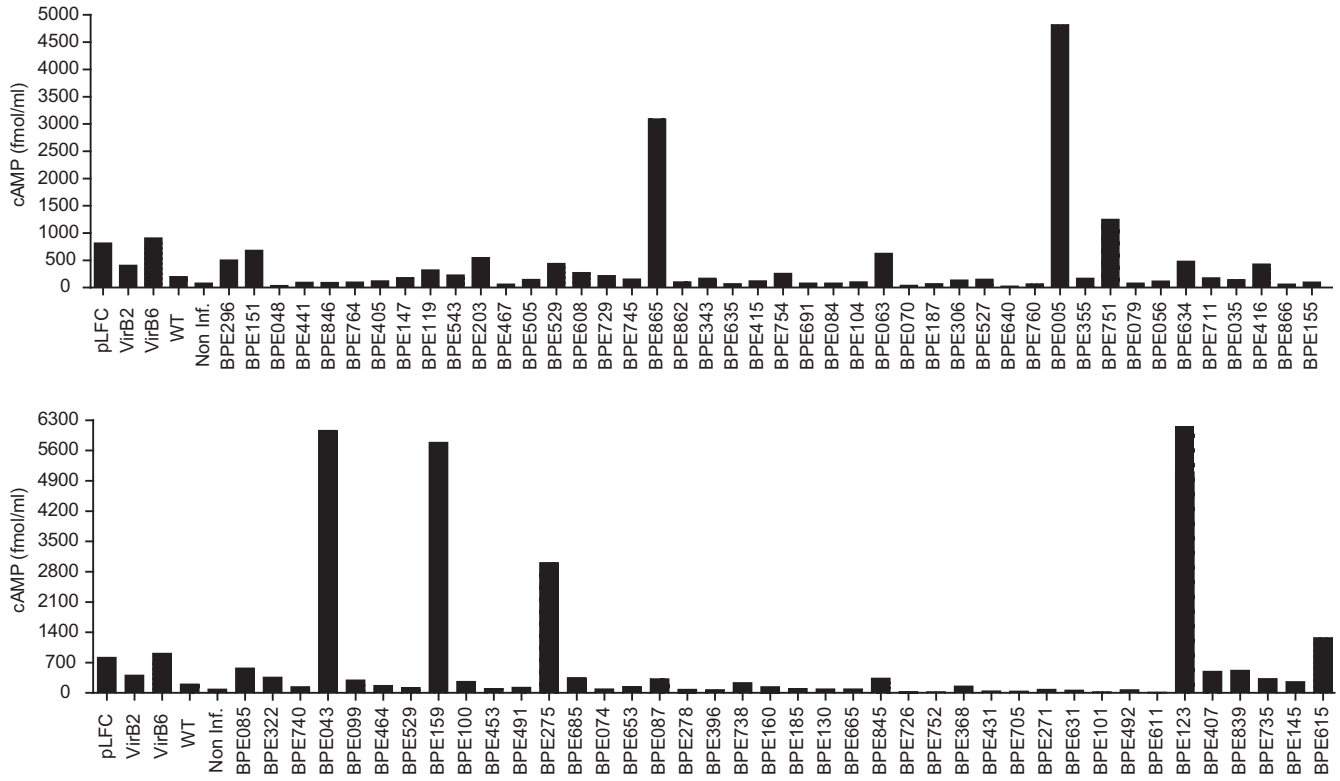

Figure S1. BPE translocation into J774.A1 cells. Intracellular cAMP levels in J774.A1 cells infected with *B. abortus* strains expressing 84 BPE-CyaA hybrid proteins were measured after a 5 h infection. Controls included strains expressing VirB2-CyaA or VirB6-CyaA hybrid proteins as well as a wild-type strain containing no plasmid (WT) or a strain containing the CyaA domain alone (pLFC). Intracellular cAMP levels were also quantified in non-infected cells. cAMP levels are representative data from four independent experiments.
