# Supplementary material
Source: PubMed Central journal article supplement (PMC3139020)
Supplement: NIHMS296719-supplement-Supp_Fig_S2.pdf [file NIHMS296719-supplement-Supp_Fig_S2.pdf]

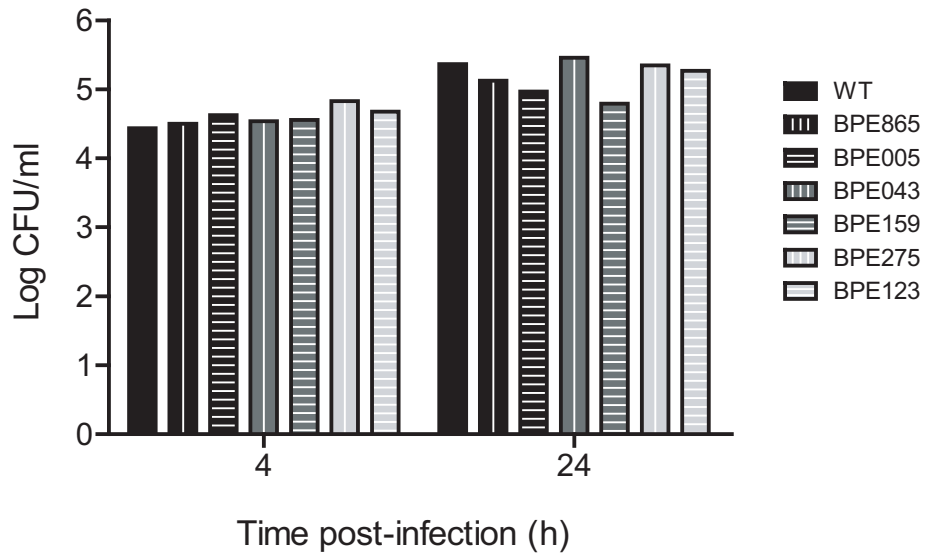

Figure S2. Intracellular replication of parental *B. abortus* 2308 (WT) and the indicated BPE-CyaA hybrid proteins in J774.A1 cells (MOI 250:1). CFUs were determined at 4 and 24 h p.i.
